# Supplementary material for: Temporal requirements of SKN-1/NRF as a regulator of lifespan and proteostasis in Caenorhabditis elegans
Source: PubMed Central journal article supplement (PMC8248617; doi:10.1371/journal.pone.0243522), 2021-07-01

## Supplemental figure 6

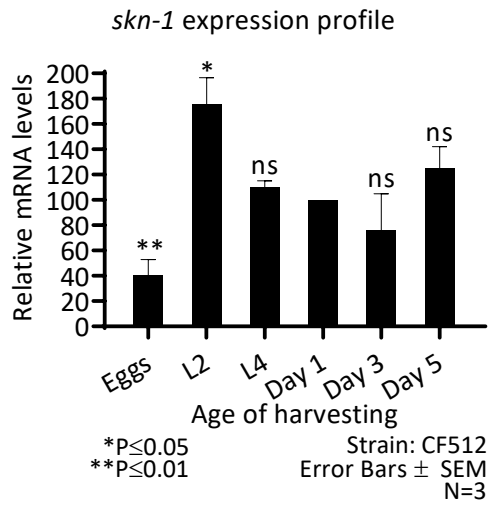

Supplement: pone.0243522.s006.pdf [file pone.0243522.s006.pdf]
