# Supplementary material for: Temporal requirements of SKN-1/NRF as a regulator of lifespan and proteostasis in Caenorhabditis elegans
Source: PubMed Central journal article supplement (PMC8248617; doi:10.1371/journal.pone.0243522), 2021-07-01
Supplement: pone.0243522.s007.pdf [file pone.0243522.s007.pdf]

**Supplemental Table 1****Lifespan of N<sub>2</sub> worms that were treated with *skn-1* RNAi from different stages of life.****(Corresponding to Fig. 1A and B)**

Strain: N2

| Treatment:                     | <i>n</i> | Censored: | Mean lifespan (days) | Standard error (days) | P value compared to control (EV) |
|--------------------------------|----------|-----------|----------------------|-----------------------|----------------------------------|
| EV                             | 76       | 44        | 18.12                | 0.51                  |                                  |
| <i>skn-1</i> RNAi              | 106      | 14        | 16.17                | 0.32                  | 4.09E-04                         |
| EV → <i>skn-1</i> RNAi (L2)    | 99       | 21        | 15.98                | 0.24                  | 3.00E-05                         |
| EV → <i>skn-1</i> RNAi (L4)    | 74       | 46        | 15.54                | 0.35                  | 2.60E-05                         |
| EV → <i>skn-1</i> RNAi (Day 1) | 108      | 12        | 17.83                | 0.31                  | 0.31                             |
| EV → <i>skn-1</i> RNAi (Day 5) | 70       | 50        | 17.51                | 0.42                  | 0.18                             |
| EV → <i>skn-1</i> RNAi (Day 9) | 82       | 38        | 18.57                | 0.54                  | 0.27                             |
